# Supplementary material for: Noble metal (Ag, Au, Pd and Pt) doped TaS2 monolayer for gas sensing: a first-principles investigation
Source: Royal Society of Chemistry journal article supplement (doi:10.1039/d1cp02011k), 2021-01-01
Supplement: d1cp02011k1.pdf [file d1cp02011k1.pdf]

# **Noble Metal (Ag, Au, Pd and Pt) Doped TaS<sub>2</sub> Monolayer for Gas Sensing: A First-Principle Investigation**

Jia Shi, Wenjing Quan, Xinwei Chen, Xiyu Chen, Yongwei Zhang, Wen Lv, Jianhua Yang\*, Min Zeng\*, Hao Wei, Nantao Hu, Yanjie Su, Zhihua Zhou, Zhi Yang\*

Key Laboratory of Thin Film and Microfabrication (Ministry of Education),  
Department of Micro/Nano Electronics, School of Electronic Information and  
Electrical Engineering, Institute of Marine Equipment, Shanghai Jiao Tong University,  
Shanghai 200240, P. R. China.

\*Corresponding authors. E-mail address: yangjh08@sjtu.edu.cn (J. H. Yang),  
minzeng@sjtu.edu.cn (M. Zeng), zhiyang@sjtu.edu.cn (Z. Yang)

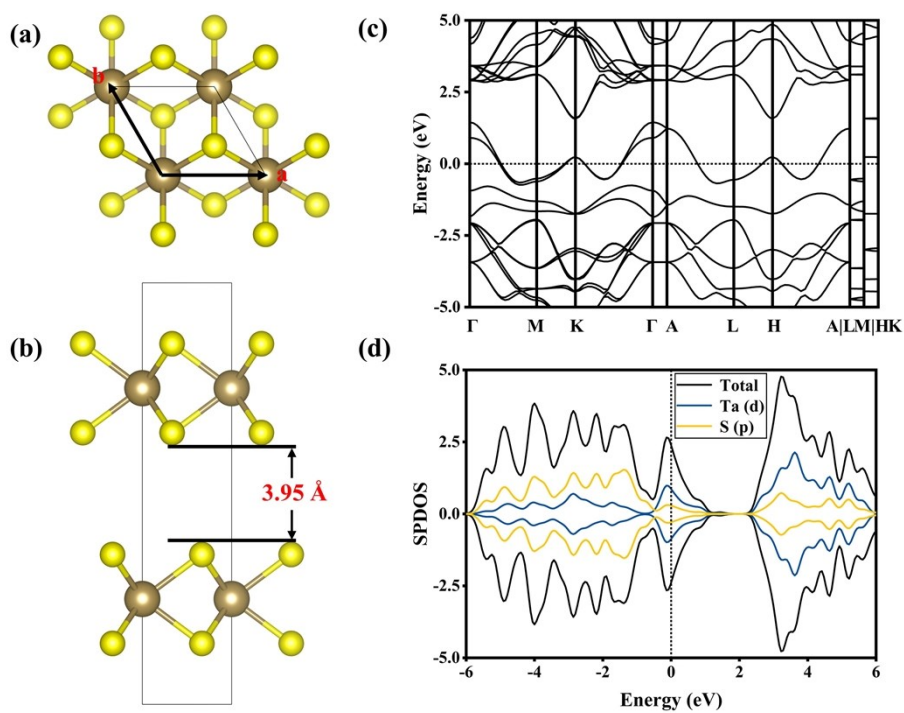

**Fig. S1** Schematic of the primitive cell of the bulk TaS<sub>2</sub> (a, b), the band structure (c), and the spin-polarized projected density of states (d).

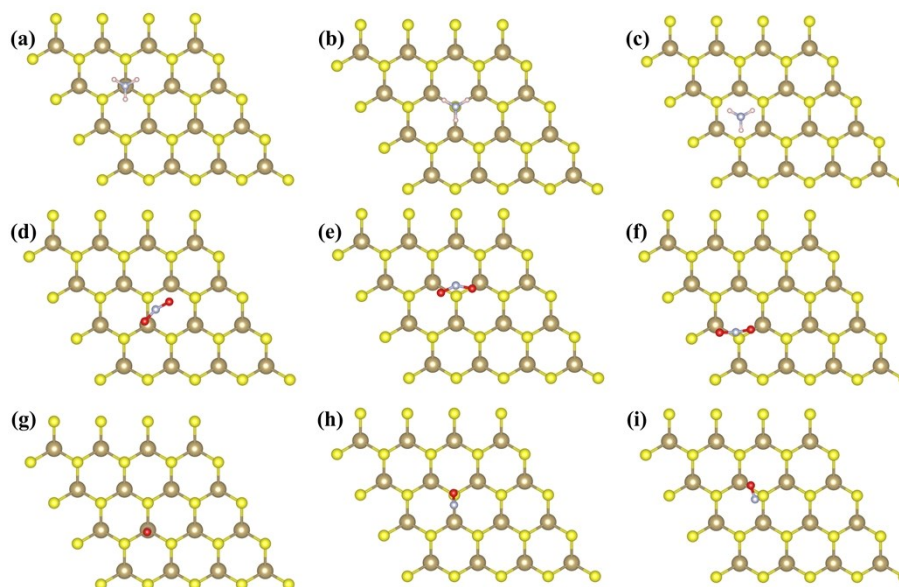

**Fig. S2** Possible adsorption configuration of NH<sub>3</sub> (a, b, c), NO<sub>2</sub> (d, e, f), and NO (g, h, i) adsorbed on the TaS<sub>2</sub> monolayer.

|                 | T <sub>Ta</sub> site                                                                                                                                           | T <sub>S</sub> site                                                                                                                                            | H site                                                                                                                                                           |
|-----------------|----------------------------------------------------------------------------------------------------------------------------------------------------------------|----------------------------------------------------------------------------------------------------------------------------------------------------------------|------------------------------------------------------------------------------------------------------------------------------------------------------------------|
| CO <sub>2</sub> | 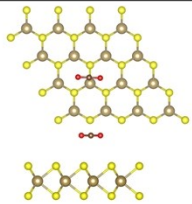<br>$E_{\text{ads}} = -0.24 \text{ eV}$<br>$Q_{\text{T}} = 0.017 \text{ e}$   | <br>$E_{\text{ads}} = -0.13 \text{ eV}$<br>$Q_{\text{T}} = 0.028 \text{ e}$   | <br>$E_{\text{ads}} = -0.24 \text{ eV}$<br>$Q_{\text{T}} = 0.016 \text{ e}$   |
| CO              | <br>$E_{\text{ads}} = -0.15 \text{ eV}$<br>$Q_{\text{T}} = 0.001 \text{ e}$   | <br>$E_{\text{ads}} = -0.16 \text{ eV}$<br>$Q_{\text{T}} = 0.007 \text{ e}$   | <br>$E_{\text{ads}} = -0.15 \text{ eV}$<br>$Q_{\text{T}} = 0.001 \text{ e}$   |
| N <sub>2</sub>  | <br>$E_{\text{ads}} = -0.14 \text{ eV}$<br>$Q_{\text{T}} = 0.008 \text{ e}$  | <br>$E_{\text{ads}} = -0.13 \text{ eV}$<br>$Q_{\text{T}} = 0.007 \text{ e}$  | <br>$E_{\text{ads}} = -0.14 \text{ eV}$<br>$Q_{\text{T}} = 0.009 \text{ e}$  |
| O <sub>2</sub>  | <br>$E_{\text{ads}} = -0.24 \text{ eV}$<br>$Q_{\text{T}} = 0.036 \text{ e}$ | <br>$E_{\text{ads}} = -0.12 \text{ eV}$<br>$Q_{\text{T}} = 0.027 \text{ e}$ | <br>$E_{\text{ads}} = -0.23 \text{ eV}$<br>$Q_{\text{T}} = 0.031 \text{ e}$ |

**Fig. S3** Possible adsorption configurations of CO<sub>2</sub>, CO, N<sub>2</sub> and O<sub>2</sub> adsorbed on TaS<sub>2</sub> monolayer.

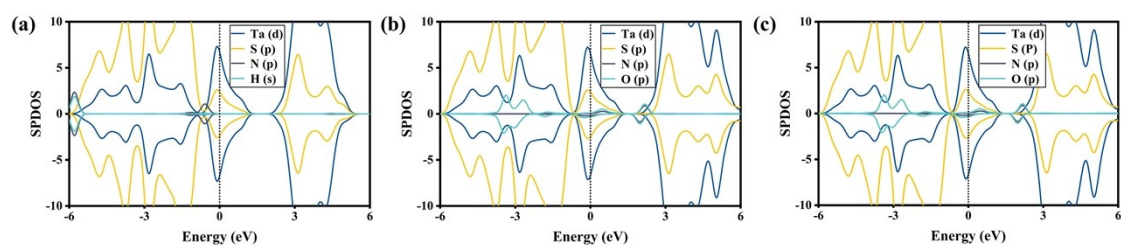

**Fig. S4** The plots of spin-polarized projected density of states for the TaS<sub>2</sub> monolayer exposed to NH<sub>3</sub> (a), NO<sub>2</sub> (b) and NO (c), respectively.

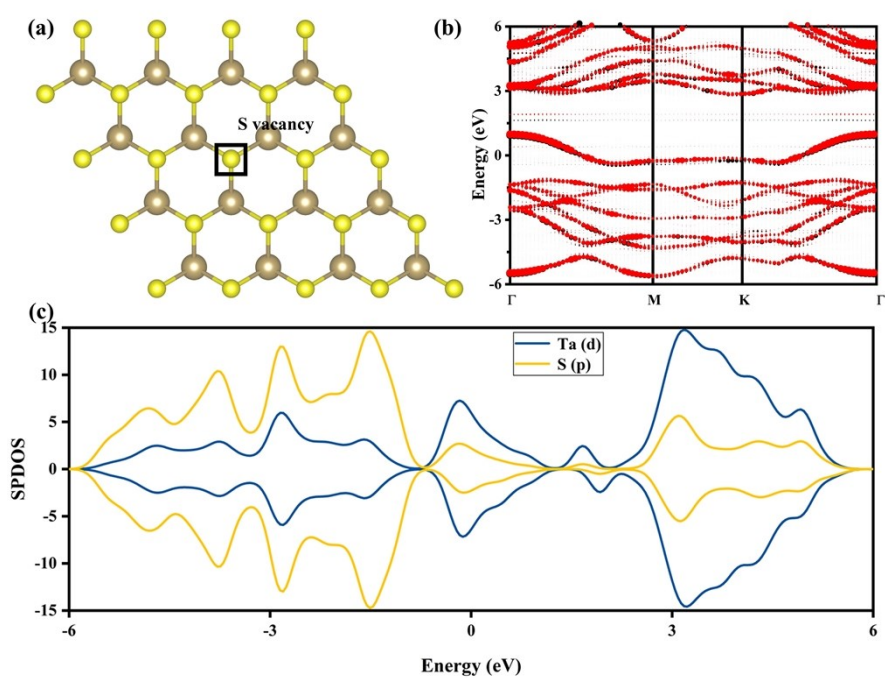

**Fig. S5** A schematic diagram of a TaS<sub>2</sub> monolayer with a S vacancy (a), effective energy band (b), and spin-polarized projected density of states (c), respectively.

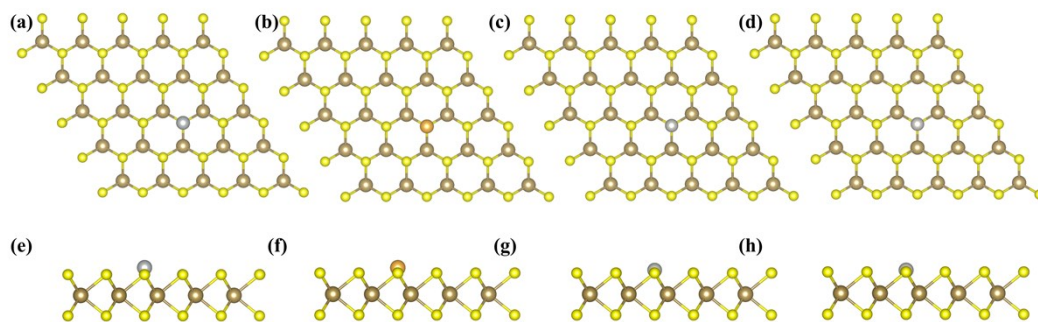

**Fig. S6** Top view (a, b, c and d) and side view (e, f, g and h) of TaS<sub>2</sub> monolayer doped with noble metal atoms (Ag, Au, Pd and Pt, NM-doped TaS<sub>2</sub>), respectively.

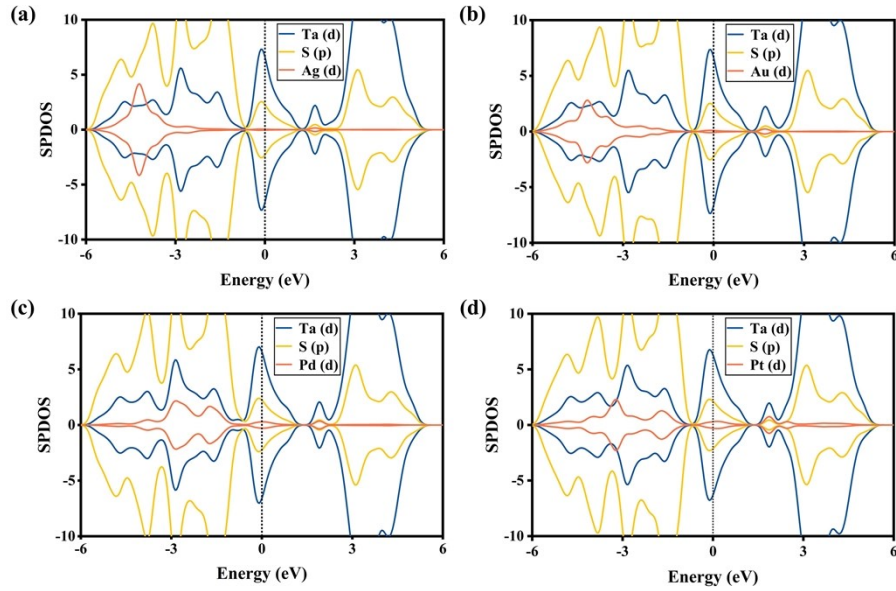

**Fig. S7** The plots of spin-polarized projected density of states of NM-doped TaS<sub>2</sub> monolayer.

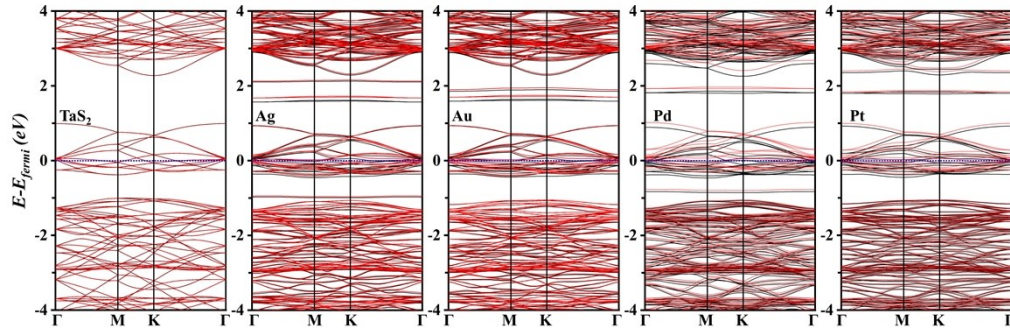

**Fig. S8** Electronic band structures of intrinsic and NM-doped TaS<sub>2</sub>. Black lines: spin up, red lines: spin down and the Fermi level is set to zero.



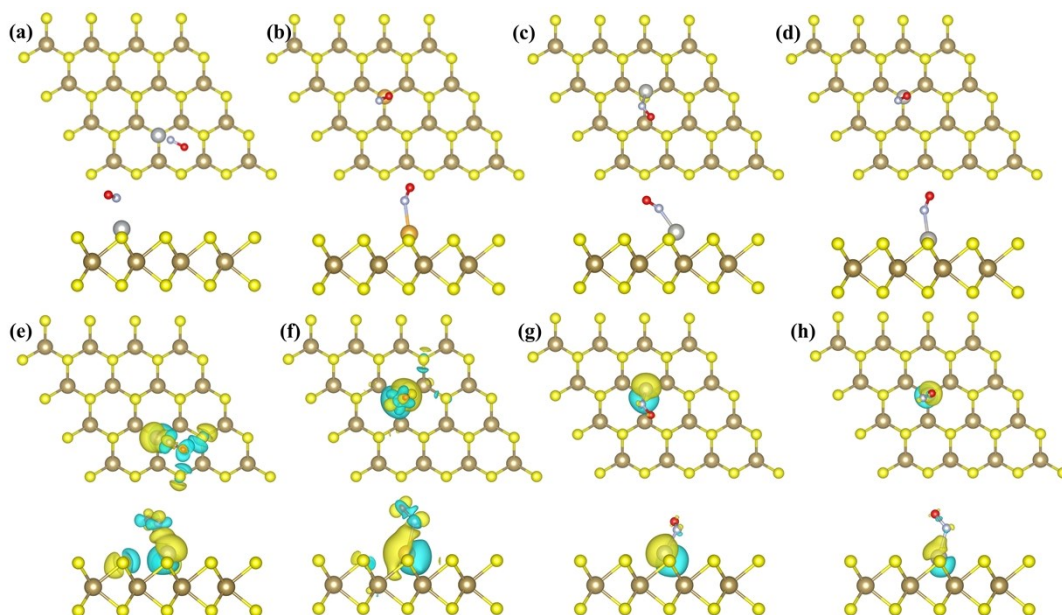

**Fig. S9** The adsorption configuration (a, b, c and d) and the isosurface charge density plots (e, f, g and h) of NO adsorbed on NM-doped TaS<sub>2</sub> monolayer using isovalue of  $0.02 \text{ e}/\text{\AA}^3$ , respectively. Cyan: charge depletion. Yellow: charge accumulation.

|                 | Ag                                                                                                                                                             | Au                                                                                                                                                             | Pd                                                                                                                                                              | Pt                                                                                                                                                               |
|-----------------|----------------------------------------------------------------------------------------------------------------------------------------------------------------|----------------------------------------------------------------------------------------------------------------------------------------------------------------|-----------------------------------------------------------------------------------------------------------------------------------------------------------------|------------------------------------------------------------------------------------------------------------------------------------------------------------------|
| CO <sub>2</sub> | 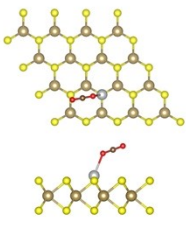<br>$E_{\text{ads}} = -0.18 \text{ eV}$<br>$Q_{\text{T}} = 0.007 \text{ e}$   | <br>$E_{\text{ads}} = -0.14 \text{ eV}$<br>$Q_{\text{T}} = 0.007 \text{ e}$   | <br>$E_{\text{ads}} = -0.16 \text{ eV}$<br>$Q_{\text{T}} = 0.017 \text{ e}$   | <br>$E_{\text{ads}} = -0.16 \text{ eV}$<br>$Q_{\text{T}} = 0.013 \text{ e}$   |
| CO              | <br>$E_{\text{ads}} = -0.56 \text{ eV}$<br>$Q_{\text{T}} = -0.085 \text{ e}$  | <br>$E_{\text{ads}} = -0.52 \text{ eV}$<br>$Q_{\text{T}} = -0.065 \text{ e}$  | <br>$E_{\text{ads}} = -0.53 \text{ eV}$<br>$Q_{\text{T}} = -0.028 \text{ e}$  | <br>$E_{\text{ads}} = -0.60 \text{ eV}$<br>$Q_{\text{T}} = -0.006 \text{ e}$  |
| N <sub>2</sub>  | <br>$E_{\text{ads}} = -0.29 \text{ eV}$<br>$Q_{\text{T}} = -0.014 \text{ e}$ | <br>$E_{\text{ads}} = -0.21 \text{ eV}$<br>$Q_{\text{T}} = -0.027 \text{ e}$ | <br>$E_{\text{ads}} = -0.23 \text{ eV}$<br>$Q_{\text{T}} = -0.012 \text{ e}$ | <br>$E_{\text{ads}} = -0.17 \text{ eV}$<br>$Q_{\text{T}} = -0.003 \text{ e}$ |
| O <sub>2</sub>  | <br>$E_{\text{ads}} = -0.41 \text{ eV}$<br>$Q_{\text{T}} = 0.173 \text{ e}$ | <br>$E_{\text{ads}} = -0.44 \text{ eV}$<br>$Q_{\text{T}} = 0.187 \text{ e}$ | <br>$E_{\text{ads}} = -0.47 \text{ eV}$<br>$Q_{\text{T}} = 0.194 \text{ e}$ | <br>$E_{\text{ads}} = -0.49 \text{ eV}$<br>$Q_{\text{T}} = 0.199 \text{ e}$ |

**Fig. S10** Adsorption configurations of CO<sub>2</sub>, CO, N<sub>2</sub> and O<sub>2</sub> adsorbed on NM-doped TaS<sub>2</sub> monolayer.

**Table S1.** The adsorption energy ( $E_{\text{ads}}$ ), charge transfer ( $Q_{\text{T}}$ ) and equilibrium height ( $h$ ) of the system between gas molecule and TaS<sub>2</sub> monolayer.

| Gas molecule    | Sites           | $E_{\text{ads}}$ (eV) | $Q_{\text{T}}$ (e) | $h$ (Å) |
|-----------------|-----------------|-----------------------|--------------------|---------|
| NH <sub>3</sub> | T <sub>Ta</sub> | -0.2162               | -0.0290            | 2.8849  |
|                 | T <sub>S</sub>  | -0.2141               | -0.0256            | 2.9460  |
|                 | H               | -0.2032               | -0.0446            | 3.2459  |
| NO <sub>2</sub> | T <sub>Ta</sub> | -0.3880               | 0.0430             | 2.4368  |
|                 | T <sub>S</sub>  | -0.3904               | 0.0428             | 2.4329  |
|                 | H               | -0.3902               | 0.0439             | 2.4288  |
| NO              | T <sub>Ta</sub> | -0.4902               | -0.1741            | 1.9174  |
|                 | T <sub>S</sub>  | -0.4409               | -0.1707            | 2.3122  |
|                 | H               | -0.4472               | -0.1709            | 2.3461  |

**Table S2.** The recovery time of the intrinsic and NM-doped TaS<sub>2</sub> monolayer exposed to NH<sub>3</sub>, NO<sub>2</sub> and NO gas molecules.

| System                            | Recovery time (s)     |                        |                        |
|-----------------------------------|-----------------------|------------------------|------------------------|
|                                   | 300 K                 | 400 K                  | 500 K                  |
| NH <sub>3</sub> -TaS <sub>2</sub> | $4.26 \times 10^{-9}$ | $5.27 \times 10^{-10}$ | $1.51 \times 10^{-10}$ |
| NH <sub>3</sub> -Ag               | $2.49 \times 10^6$    | 62.7                   | $1.09 \times 10^{-1}$  |
| NH <sub>3</sub> -Au               | $3.83 \times 10^5$    | 15.4                   | $3.55 \times 10^{-2}$  |
| NH <sub>3</sub> -Pd               | $6.67 \times 10^3$    | $7.38 \times 10^{-1}$  | $3.12 \times 10^{-3}$  |
| NH <sub>3</sub> -Pt               | $8.39 \times 10^3$    | $8.77 \times 10^{-1}$  | $3.58 \times 10^{-3}$  |
| NO-TaS <sub>2</sub>               | $1.71 \times 10^{-4}$ | $1.49 \times 10^{-6}$  | $8.69 \times 10^{-8}$  |
| NO-Ag                             | $1.14 \times 10^{-2}$ | $3.50 \times 10^{-5}$  | $1.08 \times 10^{-6}$  |
| NO-Au                             | $1.07 \times 10^{-1}$ | $1.87 \times 10^{-4}$  | $4.14 \times 10^{-6}$  |
| NO-Pd                             | $9.82 \times 10^{-1}$ | $9.87 \times 10^{-4}$  | $1.57 \times 10^{-5}$  |
| NO-Pt                             | 2.17                  | $1.79 \times 10^{-3}$  | $2.52 \times 10^{-5}$  |



|                                   |                       |                       |                       |
|-----------------------------------|-----------------------|-----------------------|-----------------------|
| NO <sub>2</sub> -TaS <sub>2</sub> | $3.58 \times 10^{-6}$ | $8.22 \times 10^{-8}$ | $8.55 \times 10^{-9}$ |
| NO <sub>2</sub> -Ag               | 44.3                  | $1.72 \times 10^{-2}$ | $1.54 \times 10^{-4}$ |
| NO <sub>2</sub> -Au               | $9.16 \times 10^2$    | $1.67 \times 10^{-1}$ | $9.49 \times 10^{-4}$ |
| NO <sub>2</sub> -Pd               | $2.62 \times 10^5$    | 11.6                  | $2.82 \times 10^{-2}$ |
| NO <sub>2</sub> -Pt               | $8.62 \times 10^6$    | $1.59 \times 10^2$    | $2.30 \times 10^{-1}$ |

---
